# Supplementary material
Source: PubMed Central journal article supplement (PMC2901439)
Supplement: 1003187107_pnas.201003187SI.pdf [file 1003187107_pnas.201003187SI.pdf]

# Supporting Information

Anderegg et al. 10.1073/pnas.1003187107

## SI Materials and Methods

We compiled a database of 1,372 climate researchers and classified each researcher as either convinced by the evidence (CE) for anthropogenic climate change or unconvinced by the evidence (UE) for ACC. We compiled these CE researchers comprehensively (i.e., all names listed) from the following lists: IPCC AR4 Working Group I Contributors (coordinating lead authors, lead authors, and contributing authors; 619 names listed), 2007 Bali Declaration (212 signers listed), Canadian Meteorological and Oceanographic Society (CMOS) 2006 statement (120 names listed), CMOS 2008 statement (130 names listed), and 37 signers of open letter protesting *The Great Global Warming Swindle* film errors. After removing duplicate names across these lists, we had a total of 903 names.

We define UE researchers as those who have signed reputable statements strongly dissenting from the views of the IPCC. We compiled UE names comprehensively from the following 12 lists: 1992 statement from the Science and Environmental Policy Project (46 names), 1995 Leipzig Declaration (80 names), 2002

letter to Canadian Prime Minister Jean Chretien (30 names), 2003 letter to Canadian Prime Minister Paul Martin (46 names), 2006 letter to Canadian Prime Minister Stephen Harper (61 names), 2007 letter to U.N. Secretary General Ban Ki-Moon (100 names), 2007 TV film *The Great Global Warming Swindle* interviewees (17 names), NIPCC: 2008 Heartland Institute document “Nature, Not Human Activity, Rules the Climate,” ed. S. Fred Singer (24 listed contributors), 2008 Manhattan Declaration from a conference in New York City (206 names listed as qualified experts), 2009 newspaper ad by the Cato Institute challenging President Obama’s stance on climate change (115 signers), 2009 Heartland Institute document “Climate Change Reconsidered: 2009 Report of the Nongovernmental Panel on Climate Change (NIPCC)” (36 authors), and 2009 letter to the American Physical Society (61 names). After removing duplicate names across these lists, we had a total of 472 names. Links to source documents are available at [http://www.eecg.utoronto.ca/~prall/climate/list\\_sources.html](http://www.eecg.utoronto.ca/~prall/climate/list_sources.html).
